# Supplementary material for: Synthesis, Biological Evaluation and Low-Toxic Formulation Development of Glycosylated Paclitaxel Prodrugs
Source: PubMed Central journal article supplement (PMC6321537; doi:10.3390/molecules23123211), 2018-12-05
Supplement: molecules-23-03211-s001.pdf [file molecules-23-03211-s001.pdf]

# Synthesis, Biological Evaluation, and Low-Toxic Formulation Development of Glycosylated Paclitaxel Prodrugs

Yukang Mao, Yili Zhang, Zheng Luo, Ruoting Zhan, Hui Xu, Weiwen Chen \* and Huicai Huang \*

Research Center of Chinese Herbal Resource Science and Engineering, Guangzhou University of Chinese Medicine; Key Laboratory of Chinese Medicinal Resource from *Lingnan* (Guangzhou University of Chinese Medicine), Ministry of Education; Joint Laboratory of National Engineering Research Center for the Pharmaceuticals of Traditional Chinese Medicines, Guangzhou, China

## Contents

|                                                 |                               |
|-------------------------------------------------|-------------------------------|
| Title Page.....                                 | SError! Bookmark not defined. |
| Linearity calibration of SG-PTX and DG-PTX..... | S2                            |
| Spectra .....                                   | S3                            |

## Linearity calibration of SG-PTX and DG-PTX

Concentrations of SG-PTX and DG-PTX in samples were calculated by calibration curve. For calibration curve, nine concentrations (9.66, 19.32, 38.41, 76.81, 153.63, 307.25, 614.5, 1229 and 2458 µg/mL of SG-PTX, 9.53, 19.06, 38.12, 76.25, 152.5, 305.5, 611.1, 1220 and 2440 µg/mL of DG-PTX) of calibration standards were processed, typical linear regression equations for the calibration curves over concentration ranges for SG-PTX and DG-PTX were shown in Figure S1 and Figure S2.

S1

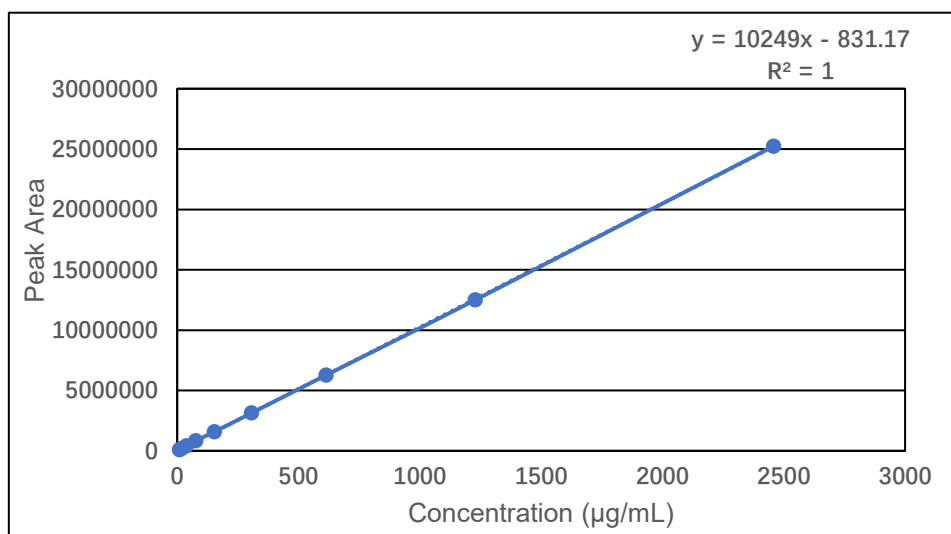

**Figure S1.** Linearity calibration of SG-PTX.

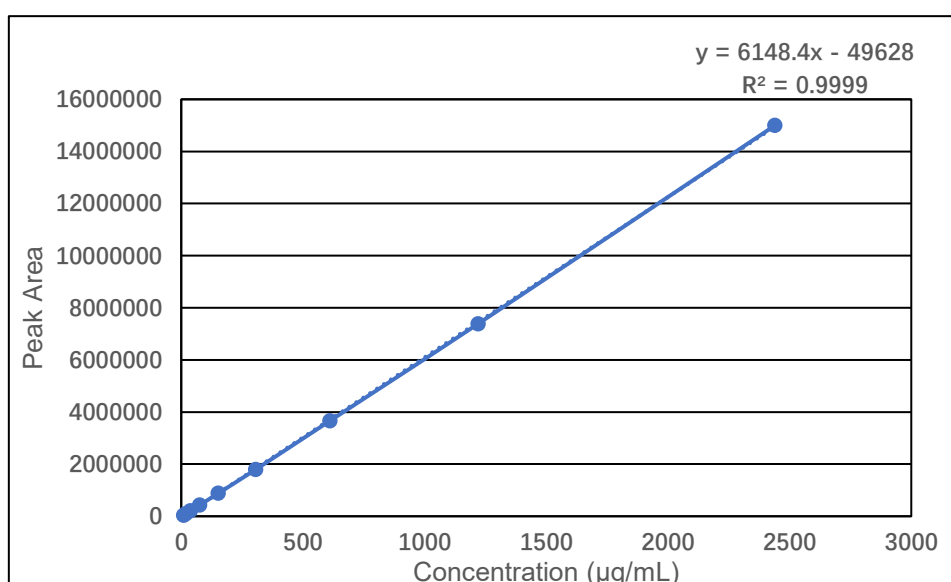

**Figure S2.** Linearity calibration of DG-PTX.

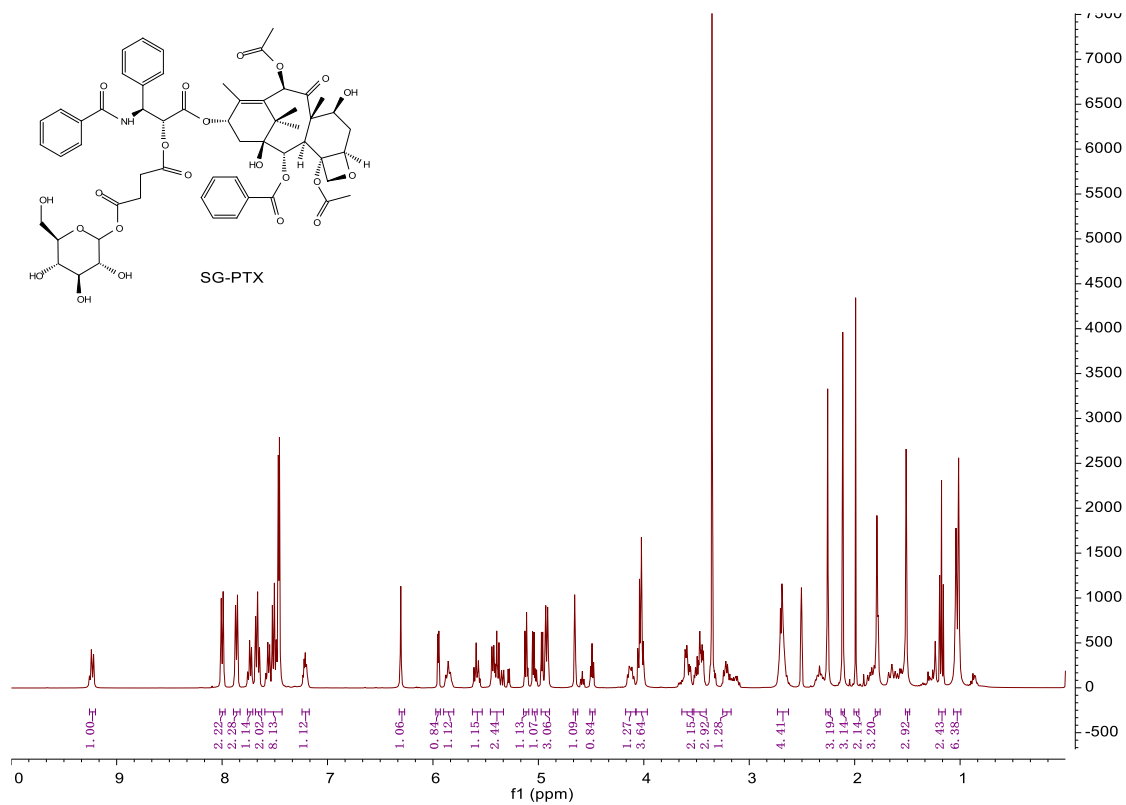

Figure S3.  $^1\text{H}$  NMR spectra of SG-PTX.

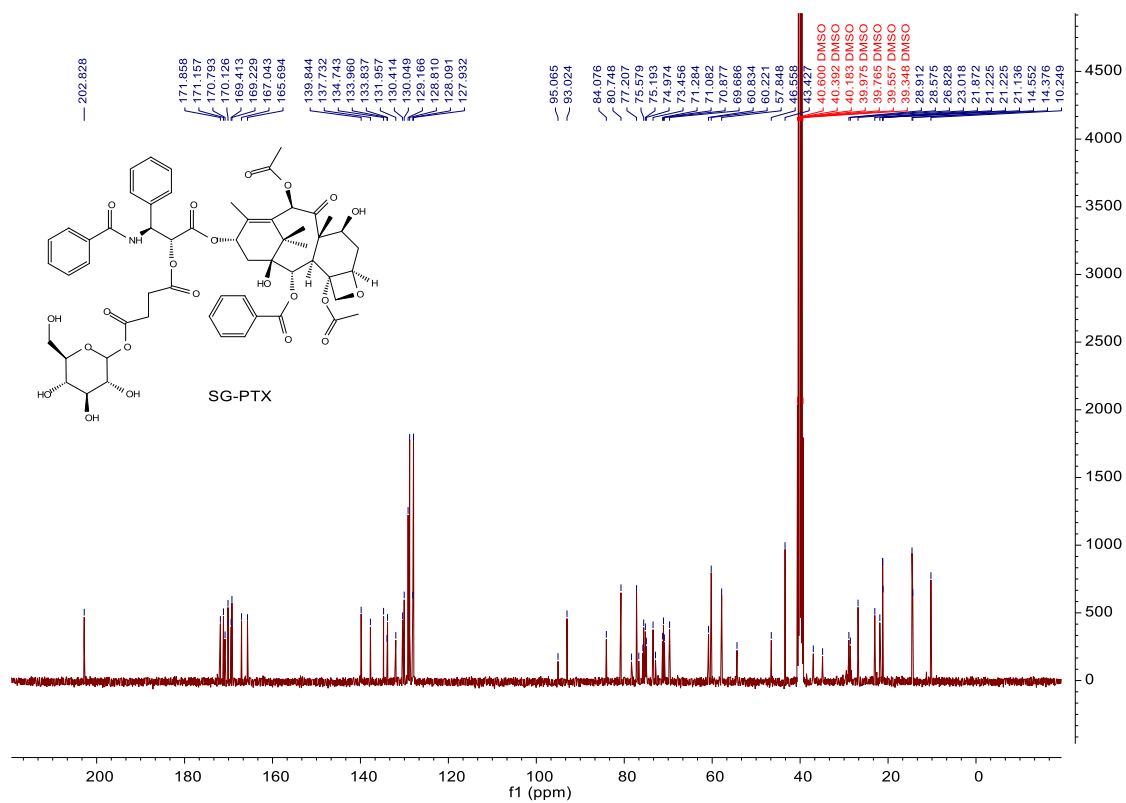

Figure S4.  $^{13}\text{C}$  NMR spectra of SG-PTX.

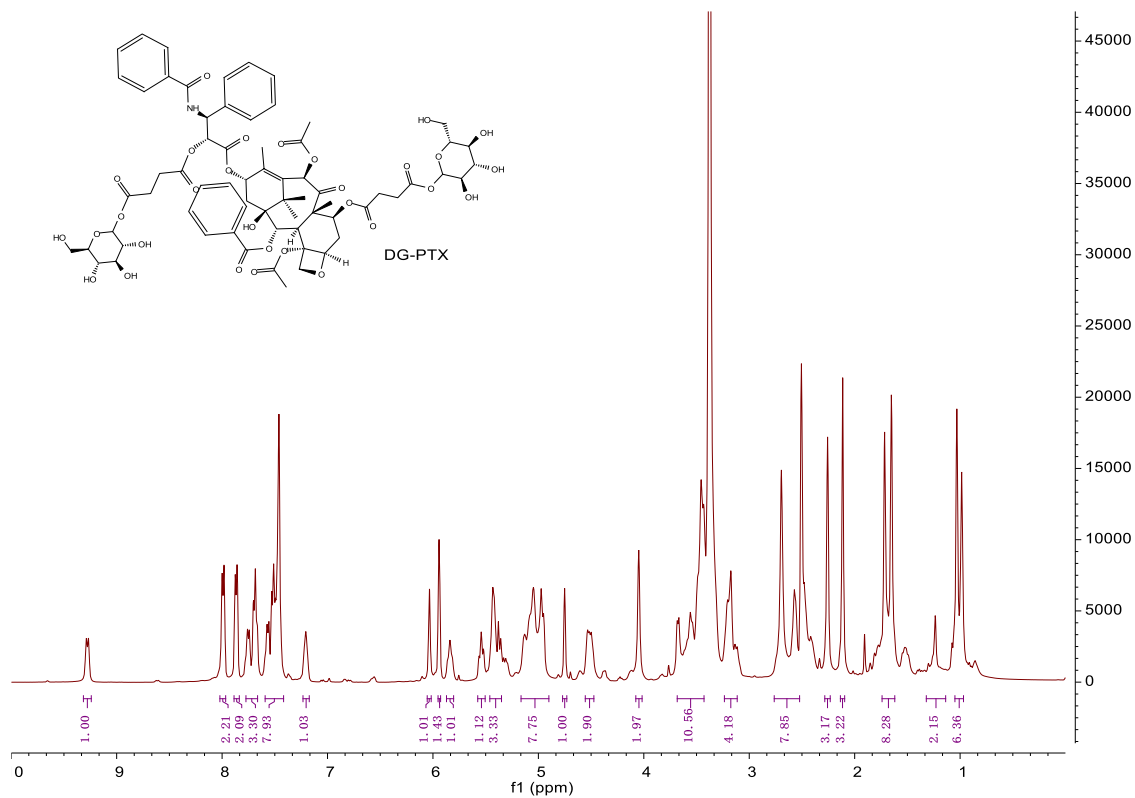

Figure S5.  $^1\text{H}$  NMR spectra of DG-PTX.

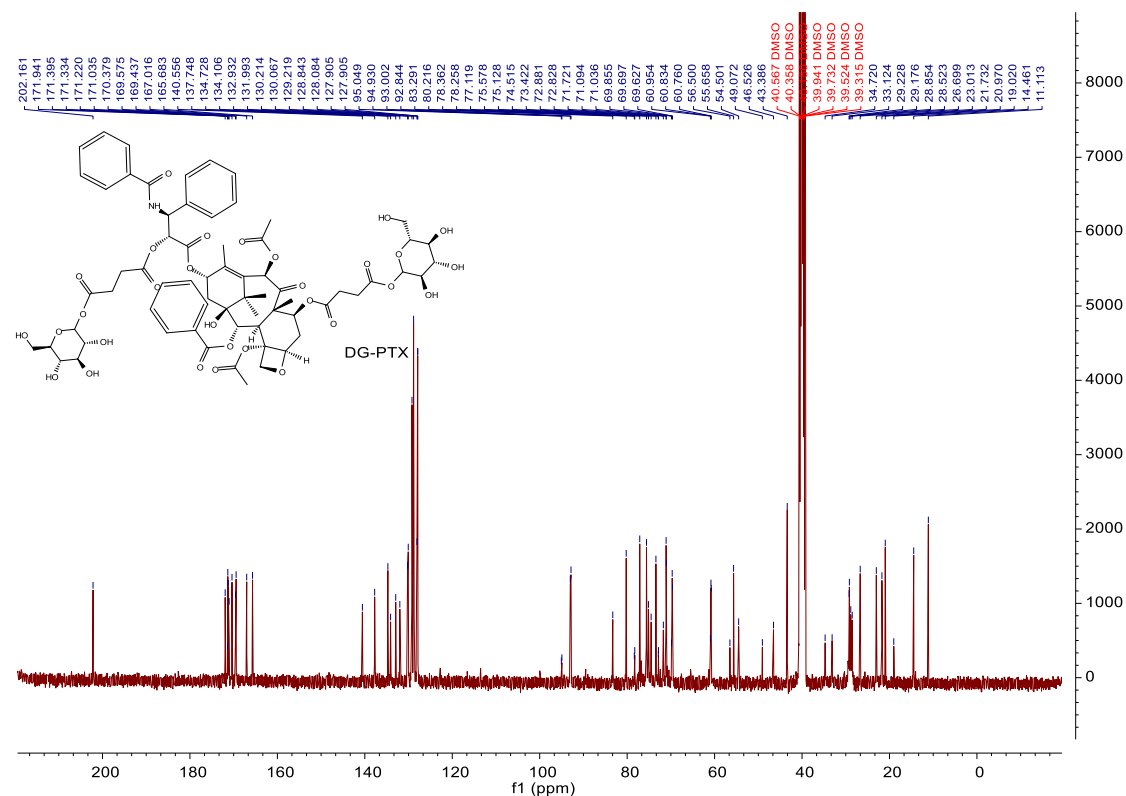

Figure S6.  $^{13}\text{C}$  NMR spectra of DG-PTX.
